# Supplementary material for: Redox Regulation of Pro-IL-1β Processing May Contribute to the Increased Severity of Serum-Induced Arthritis in NOX2-Deficient Mice
Source: PubMed Central journal article supplement — Antioxid Redox Signal. 2015 Oct 20;23(12):973–84. doi: 10.1089/ars.2014.6136 (PMC4624247; doi:10.1089/ars.2014.6136), 2015-10-20
Supplement: Supp_Fig2.pdf [file Supp_Fig2.pdf]

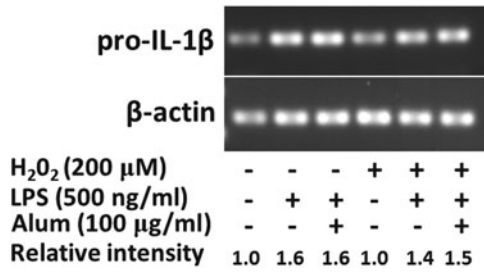

**SUPPLEMENTARY FIG. S2. Activated mouse leukocytes produce comparable amount of pro-IL-1β mRNA in the presence or absence of hydrogen peroxide.**  $1 \times 10^6$  BMDCs were seeded on 12-well plates for 30 min and were pretreated with H<sub>2</sub>O<sub>2</sub> (200 μM) for 20 min. The cells were then stimulated with LPS (500 ng/ml) for 3 h, followed by alum crystals (100 μg/ml; InvivoGen, San Diego, CA) for 30 min. The total RNA was extracted by using TRIzol<sup>®</sup> reagent (Invitrogen, Carlsbad, CA) according to the respective instructions. Two micrograms of each total RNA sample was reverse transcribed for first-strand synthesis of cDNA by using 200 units of Moloney Murine Leukemia Virus Reverse Transcriptase, M-MLV RT (Promega). PCR was performed in the reaction mixture containing mpro-IL-1β or mβ-actin primer and 7.5 ng cDNA, and the primers for PCR reaction were as follows: mpro-IL-1β: forward GCA ACT GTT CCT GAA CTC AAC T; reverse ATC TTT TGG GGT CCG TCA AT, and mβ-actin: forward ACT GCC GCA TCC TCT TCC TC; reverse TGC CAC AGG ATT CCA TAC CC. The PCR products were then analyzed on agarose gel. The band intensities were measured using ImageJ 1.48 and were normalized with internal control. The experiment was repeated with similar results. BMDC, bone marrow-derived dendritic cells.
