# Supplementary material for: Redox Regulation of Pro-IL-1β Processing May Contribute to the Increased Severity of Serum-Induced Arthritis in NOX2-Deficient Mice
Source: PubMed Central journal article supplement — Antioxid Redox Signal. 2015 Oct 20;23(12):973–84. doi: 10.1089/ars.2014.6136 (PMC4624247; doi:10.1089/ars.2014.6136), 2015-10-20
Supplement: Supp_Fig3.pdf [file Supp_Fig3.pdf]

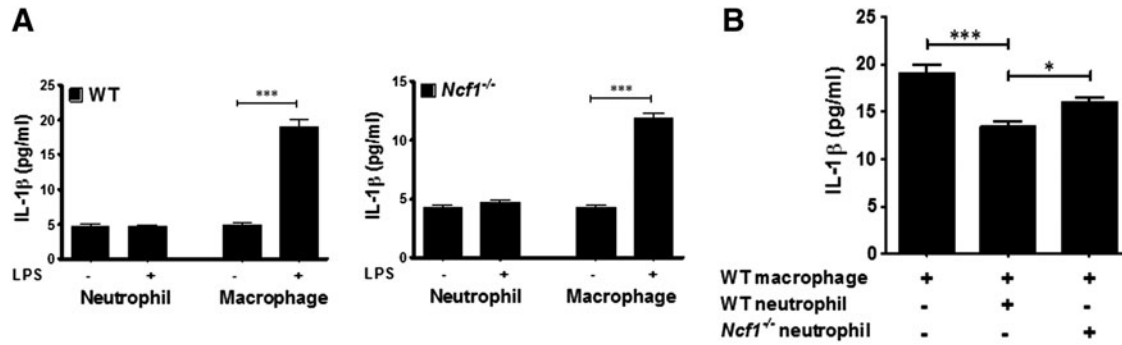

**SUPPLEMENTARY FIG. S3. Activated macrophages produce more IL-1 $\beta$  than neutrophils, which may suppress the production of IL-1 $\beta$  in an NOX2-dependent manner.** (A) The neutrophil and monocyte were harvested from the bone marrow of different strains of mice. The monocyte was cultured in RPMI with 30% LCCM for 7 days to be the macrophage. The immune cells ( $1 \times 10^6$  cells/ml) were stimulated with LPS (500 ng/ml) for 20 h (macrophage control  $n=8$ ; LPS,  $n=12$ ; neutrophil control  $n=4$ ; LPS  $n=6$ ). Neutrophils were pretreated with PMA (400 ng/ml) at 37°C for 15 min. (B) The PMA-activated neutrophil ( $5 \times 10^5$  cells/ml) and macrophage ( $1 \times 10^6$  cells/ml) were cocultured in the 24-well plates with LPS (500 ng/ml) for 20 h (control  $n=8$ ; LPS  $n=12$ ). The levels of IL-1 $\beta$  were then quantified with IL-1 $\beta$  ELISA. The statistically significant differences between groups were analyzed with one-way ANOVA and are indicated with \* and \*\*\* (\* $p < 0.05$ , \*\*\* $p < 0.001$ ). The experiments were repeated with similar results. IL, interleukin; LCCM, L929 cell-conditioned medium; LPS, lipopolysaccharide; NOX2, NADPH oxidase 2.
